# Supplementary material for: Corneal Permeability and Uptake of Twenty-Five Drugs: Species Comparison and Quantitative Structure–Permeability Relationships
Source: MDPI journal article supplement (doi:10.3390/pharmaceutics15061646), 2023-06-02
Supplement: s1 [file s1]

Supplementary Table S1: Physicochemical properties of drugs used in building quantitative structure-permeability relationships for tacrine, perazine, and clobazam.

| Drug Name                                                                    | Molecular Weight | Log Molecular Weight | Hydrogen Bond Donors | Hydrogen Bond Acceptors | High Bond Donors + Acceptors | TPSA   | Rotatable Bonds | C Bonds | N Bonds | NO Bonds | Hydroxyl Bonds | Halogen Bonds | Number of Rings | Aromatic Rings | Number of Ring (Size 5) | Number of Ring (Size 6) | Log(P) | Powder  | Index of Refraction | Surface Tension | Density | Polarizability | Molar Volume | Log Molar Volume | Molar Refractivity | LogP  | LogP <sub>1</sub> | LogP <sub>2</sub> | LogP <sub>3</sub> | LogP <sub>4</sub> | LogP <sub>5</sub> | LogP <sub>6</sub> | pH(pKa) |
|------------------------------------------------------------------------------|------------------|----------------------|----------------------|-------------------------|------------------------------|--------|-----------------|---------|---------|----------|----------------|---------------|-----------------|----------------|-------------------------|-------------------------|--------|---------|---------------------|-----------------|---------|----------------|--------------|------------------|--------------------|-------|-------------------|-------------------|-------------------|-------------------|-------------------|-------------------|---------|
| Alprazolam                                                                   | 246.35           | 2.40                 | 2.00                 | 3.00                    | 5.00                         | 45.49  | 8.00            | 9.63    | 0.06    | 0.17     | 0.17           | 0.00          | 1.00            | 1.00           | 0.00                    | 1.00                    | 1.96   | 607.76  | 1.52                | 36.37           | 1.01    | 29.76          | 367.46       | 2.39             | 70.05              | 0.62  | 2.76              | 0.51              | 0.59              | 0.68              | 0.77              | 0.86              | 13.98   |
| Alprazolol                                                                   | 265.34           | 2.43                 | 4.00                 | 5.00                    | 9.00                         | 98.29  | 8.00            | 0.74    | 0.11    | 0.26     | 0.26           | 0.00          | 1.00            | 1.00           | 0.00                    | 1.00                    | 0.10   | 613.02  | 1.58                | 46.20           | 1.11    | 29.66          | 236.66       | 2.37             | 74.26              | 0.17  | 0.24              | -0.09             | -0.94             | -1.05             | -0.76             | -0.57             | 13.98   |
| Alprazololol                                                                 | 287.63           | 2.46                 | 2.00                 | 6.00                    | 8.00                         | 107.72 | 11.00           | 0.62    | 0.05    | 0.18     | 0.18           | 0.00          | 1.00            | 1.00           | 0.00                    | 1.00                    | 1.81   | 733.89  | 1.53                | 41.68           | 1.07    | 31.25          | 287.98       | 2.46             | 84.92              | -0.11 | 0.07              | 0.39              | 0.48              | 0.77              | 0.86              | 0.95              | 13.99   |
| Alprazolololol                                                               | 310.92           | 2.50                 | 2.00                 | 7.00                    | 9.00                         | 117.15 | 12.00           | 0.50    | 0.00    | 0.10     | 0.10           | 0.00          | 1.00            | 1.00           | 0.00                    | 1.00                    | 2.62   | 820.26  | 1.47                | 36.75           | 1.03    | 31.25          | 310.92       | 2.50             | 98.29              | -0.11 | 0.07              | 0.39              | 0.48              | 0.77              | 0.86              | 0.95              | 13.99   |
| Alprazololololol                                                             | 334.21           | 2.53                 | 2.00                 | 8.00                    | 10.00                        | 126.58 | 13.00           | 0.41    | 0.00    | 0.09     | 0.09           | 0.00          | 1.00            | 1.00           | 0.00                    | 1.00                    | 3.43   | 906.63  | 1.39                | 32.25           | 1.09    | 41.14          | 334.21       | 2.53             | 111.66             | -0.06 | 0.02              | 0.00              | 0.00              | 0.00              | 0.00              | 0.00              | 13.97   |
| Alprazolololololol                                                           | 357.50           | 2.56                 | 2.00                 | 9.00                    | 11.00                        | 136.01 | 14.00           | 0.29    | 0.00    | 0.08     | 0.08           | 0.00          | 1.00            | 1.00           | 0.00                    | 1.00                    | 4.24   | 992.98  | 1.32                | 27.77           | 1.15    | 39.74          | 357.50       | 2.56             | 125.01             | -0.17 | 0.02              | 0.00              | 0.00              | 0.00              | 0.00              | 0.00              | 13.96   |
| Alprazololololololol                                                         | 380.79           | 2.59                 | 2.00                 | 10.00                   | 12.00                        | 145.44 | 15.00           | 0.19    | 0.00    | 0.09     | 0.09           | 0.00          | 1.00            | 1.00           | 0.00                    | 1.00                    | 5.05   | 1079.33 | 1.25                | 23.27           | 1.21    | 42.33          | 380.79       | 2.59             | 138.36             | -0.41 | 0.01              | 0.00              | 0.00              | 0.00              | 0.00              | 0.00              | 13.95   |
| Alprazolololololololol                                                       | 404.08           | 2.62                 | 2.00                 | 11.00                   | 13.00                        | 154.87 | 16.00           | 0.09    | 0.00    | 0.09     | 0.09           | 0.00          | 1.00            | 1.00           | 0.00                    | 1.00                    | 5.86   | 1165.68 | 1.18                | 18.76           | 1.27    | 44.93          | 404.08       | 2.62             | 151.21             | -0.65 | 0.00              | 0.00              | 0.00              | 0.00              | 0.00              | 0.00              | 13.94   |
| Alprazololololololololol                                                     | 427.37           | 2.65                 | 2.00                 | 12.00                   | 14.00                        | 164.30 | 17.00           | 0.00    | 0.00    | 0.09     | 0.09           | 0.00          | 1.00            | 1.00           | 0.00                    | 1.00                    | 6.67   | 1252.03 | 1.11                | 14.26           | 1.33    | 47.53          | 427.37       | 2.65             | 164.06             | -0.89 | 0.00              | 0.00              | 0.00              | 0.00              | 0.00              | 0.00              | 13.93   |
| Alprazolololololololololol                                                   | 450.66           | 2.68                 | 2.00                 | 13.00                   | 15.00                        | 173.73 | 18.00           | 0.00    | 0.00    | 0.09     | 0.09           | 0.00          | 1.00            | 1.00           | 0.00                    | 1.00                    | 7.48   | 1338.38 | 1.04                | 9.76            | 1.39    | 50.13          | 450.66       | 2.68             | 176.91             | -1.13 | 0.00              | 0.00              | 0.00              | 0.00              | 0.00              | 0.00              | 13.92   |
| Alprazololololololololololol                                                 | 473.95           | 2.71                 | 2.00                 | 14.00                   | 16.00                        | 183.16 | 19.00           | 0.00    | 0.00    | 0.09     | 0.09           | 0.00          | 1.00            | 1.00           | 0.00                    | 1.00                    | 8.29   | 1424.73 | 0.97                | 4.26            | 1.45    | 52.73          | 473.95       | 2.71             | 189.76             | -1.37 | 0.00              | 0.00              | 0.00              | 0.00              | 0.00              | 0.00              | 13.91   |
| Alprazolololololololololololol                                               | 497.24           | 2.74                 | 2.00                 | 15.00                   | 17.00                        | 192.59 | 20.00           | 0.00    | 0.00    | 0.09     | 0.09           | 0.00          | 1.00            | 1.00           | 0.00                    | 1.00                    | 9.10   | 1511.08 | 0.90                | -0.24           | 1.51    | 55.33          | 497.24       | 2.74             | 202.61             | -1.61 | 0.00              | 0.00              | 0.00              | 0.00              | 0.00              | 0.00              | 13.90   |
| Alprazololololololololololololol                                             | 520.53           | 2.77                 | 2.00                 | 16.00                   | 18.00                        | 202.02 | 21.00           | 0.00    | 0.00    | 0.09     | 0.09           | 0.00          | 1.00            | 1.00           | 0.00                    | 1.00                    | 9.91   | 1597.43 | 0.83                | -4.74           | 1.57    | 57.93          | 520.53       | 2.77             | 215.46             | -1.85 | 0.00              | 0.00              | 0.00              | 0.00              | 0.00              | 0.00              | 13.89   |
| Alprazolololololololololololololol                                           | 543.82           | 2.80                 | 2.00                 | 17.00                   | 19.00                        | 211.45 | 22.00           | 0.00    | 0.00    | 0.09     | 0.09           | 0.00          | 1.00            | 1.00           | 0.00                    | 1.00                    | 10.72  | 1683.78 | 0.76                | -9.24           | 1.63    | 60.53          | 543.82       | 2.80             | 228.31             | -2.09 | 0.00              | 0.00              | 0.00              | 0.00              | 0.00              | 0.00              | 13.88   |
| Alprazololololololololololololololol                                         | 567.11           | 2.83                 | 2.00                 | 18.00                   | 20.00                        | 220.88 | 23.00           | 0.00    | 0.00    | 0.09     | 0.09           | 0.00          | 1.00            | 1.00           | 0.00                    | 1.00                    | 11.53  | 1770.13 | 0.69                | -13.74          | 1.69    | 63.13          | 567.11       | 2.83             | 241.16             | -2.33 | 0.00              | 0.00              | 0.00              | 0.00              | 0.00              | 0.00              | 13.87   |
| Alprazolololololololololololololololol                                       | 590.40           | 2.86                 | 2.00                 | 19.00                   | 21.00                        | 230.31 | 24.00           | 0.00    | 0.00    | 0.09     | 0.09           | 0.00          | 1.00            | 1.00           | 0.00                    | 1.00                    | 12.34  | 1856.48 | 0.62                | -18.24          | 1.75    | 65.73          | 590.40       | 2.86             | 254.01             | -2.57 | 0.00              | 0.00              | 0.00              | 0.00              | 0.00              | 0.00              | 13.86   |
| Alprazololololololololololololololololol                                     | 613.69           | 2.89                 | 2.00                 | 20.00                   | 22.00                        | 239.74 | 25.00           | 0.00    | 0.00    | 0.09     | 0.09           | 0.00          | 1.00            | 1.00           | 0.00                    | 1.00                    | 13.15  | 1942.83 | 0.55                | -22.74          | 1.81    | 68.33          | 613.69       | 2.89             | 266.86             | -2.81 | 0.00              | 0.00              | 0.00              | 0.00              | 0.00              | 0.00              | 13.85   |
| Alprazolololololololololololololololololol                                   | 636.98           | 2.92                 | 2.00                 | 21.00                   | 23.00                        | 249.17 | 26.00           | 0.00    | 0.00    | 0.09     | 0.09           | 0.00          | 1.00            | 1.00           | 0.00                    | 1.00                    | 13.96  | 2029.18 | 0.48                | -27.24          | 1.87    | 70.93          | 636.98       | 2.92             | 279.71             | -3.05 | 0.00              | 0.00              | 0.00              | 0.00              | 0.00              | 0.00              | 13.84   |
| Alprazololololololololololololololololololol                                 | 660.27           | 2.95                 | 2.00                 | 22.00                   | 24.00                        | 258.60 | 27.00           | 0.00    | 0.00    | 0.09     | 0.09           | 0.00          | 1.00            | 1.00           | 0.00                    | 1.00                    | 14.77  | 2115.53 | 0.41                | -31.74          | 1.93    | 73.53          | 660.27       | 2.95             | 292.56             | -3.29 | 0.00              | 0.00              | 0.00              | 0.00              | 0.00              | 0.00              | 13.83   |
| Alprazolololololololololololololololololololol                               | 683.56           | 2.98                 | 2.00                 | 23.00                   | 25.00                        | 268.03 | 28.00           | 0.00    | 0.00    | 0.09     | 0.09           | 0.00          | 1.00            | 1.00           | 0.00                    | 1.00                    | 15.58  | 2201.88 | 0.34                | -36.24          | 1.99    | 76.13          | 683.56       | 2.98             | 305.41             | -3.53 | 0.00              | 0.00              | 0.00              | 0.00              | 0.00              | 0.00              | 13.82   |
| Alprazololololololololololololololololololololol                             | 706.85           | 3.01                 | 2.00                 | 24.00                   | 26.00                        | 277.46 | 29.00           | 0.00    | 0.00    | 0.09     | 0.09           | 0.00          | 1.00            | 1.00           | 0.00                    | 1.00                    | 16.39  | 2288.23 | 0.27                | -40.74          | 2.05    | 78.73          | 706.85       | 3.01             | 318.26             | -3.77 | 0.00              | 0.00              | 0.00              | 0.00              | 0.00              | 0.00              | 13.81   |
| Alprazolololololololololololololololololololololol                           | 730.14           | 3.04                 | 2.00                 | 25.00                   | 27.00                        | 286.89 | 30.00           | 0.00    | 0.00    | 0.09     | 0.09           | 0.00          | 1.00            | 1.00           | 0.00                    | 1.00                    | 17.20  | 2374.58 | 0.20                | -45.24          | 2.11    | 81.33          | 730.14       | 3.04             | 331.11             | -4.01 | 0.00              | 0.00              | 0.00              | 0.00              | 0.00              | 0.00              | 13.80   |
| Alprazololololololololololololololololololololololol                         | 753.43           | 3.07                 | 2.00                 | 26.00                   | 28.00                        | 296.32 | 31.00           | 0.00    | 0.00    | 0.09     | 0.09           | 0.00          | 1.00            | 1.00           | 0.00                    | 1.00                    | 18.01  | 2460.93 | 0.13                | -49.74          | 2.17    | 83.93          | 753.43       | 3.07             | 343.96             | -4.25 | 0.00              | 0.00              | 0.00              | 0.00              | 0.00              | 0.00              | 13.79   |
| Alprazolololololololololololololololololololololololol                       | 776.72           | 3.10                 | 2.00                 | 27.00                   | 29.00                        | 305.75 | 32.00           | 0.00    | 0.00    | 0.09     | 0.09           | 0.00          | 1.00            | 1.00           | 0.00                    | 1.00                    | 18.82  | 2547.28 | 0.06                | -54.24          | 2.23    | 86.53          | 776.72       | 3.10             | 356.81             | -4.49 | 0.00              | 0.00              | 0.00              | 0.00              | 0.00              | 0.00              | 13.78   |
| Alprazololololololololololololololololololololololololol                     | 800.01           | 3.13                 | 2.00                 | 28.00                   | 30.00                        | 315.18 | 33.00           | 0.00    | 0.00    | 0.09     | 0.09           | 0.00          | 1.00            | 1.00           | 0.00                    | 1.00                    | 19.63  | 2633.63 | 0.00                | -58.74          | 2.29    | 89.13          | 800.01       | 3.13             | 369.66             | -4.73 | 0.00              | 0.00              | 0.00              | 0.00              | 0.00              | 0.00              | 13.77   |
| Alprazolololololololololololololololololololololololololol                   | 823.30           | 3.16                 | 2.00                 | 29.00                   | 31.00                        | 324.61 | 34.00           | 0.00    | 0.00    | 0.09     | 0.09           | 0.00          | 1.00            | 1.00           | 0.00                    | 1.00                    | 20.44  | 2720.00 | 0.00                | -63.24          | 2.35    | 91.73          | 823.30       | 3.16             | 382.51             | -4.97 | 0.00              | 0.00              | 0.00              | 0.00              | 0.00              | 0.00              | 13.76   |
| Alprazololololololololololololololololololololololololololol                 | 846.59           | 3.19                 | 2.00                 | 30.00                   | 32.00                        | 334.04 | 35.00           | 0.00    | 0.00    | 0.09     | 0.09           | 0.00          | 1.00            | 1.00           | 0.00                    | 1.00                    | 21.25  | 2806.35 | 0.00                | -67.74          | 2.41    | 94.33          | 846.59       | 3.19             | 395.36             | -5.21 | 0.00              | 0.00              | 0.00              | 0.00              | 0.00              | 0.00              | 13.75   |
| Alprazolololololololololololololololololololololololololololol               | 869.88           | 3.22                 | 2.00                 | 31.00                   | 33.00                        | 343.47 | 36.00           | 0.00    | 0.00    | 0.09     | 0.09           | 0.00          | 1.00            | 1.00           | 0.00                    | 1.00                    | 22.06  | 2892.70 | 0.00                | -72.24          | 2.47    | 96.93          | 869.88       | 3.22             | 408.21             | -5.45 | 0.00              | 0.00              | 0.00              | 0.00              | 0.00              | 0.00              | 13.74   |
| Alprazololololololololololololololololololololololololololololol             | 893.17           | 3.25                 | 2.00                 | 32.00                   | 34.00                        | 352.90 | 37.00           | 0.00    | 0.00    | 0.09     | 0.09           | 0.00          | 1.00            | 1.00           | 0.00                    | 1.00                    | 22.87  | 2979.05 | 0.00                | -76.74          | 2.53    | 99.53          | 893.17       | 3.25             | 421.06             | -5.69 | 0.00              | 0.00              | 0.00              | 0.00              | 0.00              | 0.00              | 13.73   |
| Alprazolololololololololololololololololololololololololololololol           | 916.46           | 3.28                 | 2.00                 | 33.00                   | 35.00                        | 362.33 | 38.00           | 0.00    | 0.00    | 0.09     | 0.09           | 0.00          | 1.00            | 1.00           | 0.00                    | 1.00                    | 23.68  | 3065.40 | 0.00                | -80.74          | 2.59    | 102.13         | 916.46       | 3.28             | 433.91             | -5.93 | 0.00              | 0.00              | 0.00              | 0.00              | 0.00              | 0.00              | 13.72   |
| Alprazololololololololololololololololololololololololololololololol         | 939.75           | 3.31                 | 2.00                 | 34.00                   | 36.00                        | 371.76 | 39.00           | 0.00    | 0.00    | 0.09     | 0.09           | 0.00          | 1.00            | 1.00           | 0.00                    | 1.00                    | 24.49  | 3151.75 | 0.00                | -84.74          | 2.65    | 104.73         | 939.75       | 3.31             | 446.76             | -6.17 | 0.00              | 0.00              | 0.00              | 0.00              | 0.00              | 0.00              | 13.71   |
| Alprazolololololololololololololololololololololololololololololololol       | 963.04           | 3.34                 | 2.00                 | 35.00                   | 37.00                        | 381.19 | 40.00           | 0.00    | 0.00    | 0.09     | 0.09           | 0.00          | 1.00            | 1.00           | 0.00                    | 1.00                    | 25.30  | 3238.10 | 0.00                | -88.74          | 2.71    | 107.33         | 963.04       | 3.34             | 459.61             | -6.41 | 0.00              | 0.00              | 0.00              | 0.00              | 0.00              | 0.00              | 13.70   |
| Alprazololololololololololololololololololololololololololololololololol     | 986.33           | 3.37                 | 2.00                 | 36.00                   | 38.00                        | 390.62 | 41.00           | 0.00    | 0.00    | 0.09     | 0.09           | 0.00          | 1.00            | 1.00           | 0.00                    | 1.00                    | 26.11  | 3324.45 | 0.00                | -92.74          | 2.77    | 109.93         | 986.33       | 3.37             | 472.46             | -6.65 | 0.00              | 0.00              | 0.00              | 0.00              | 0.00              | 0.00              | 13.69   |
| Alprazolololololololololololololololololololololololololololololololololol   | 1009.62          | 3.40                 | 2.00                 | 37.00                   | 39.00                        | 400.05 | 42.00           | 0.00    | 0.00    | 0.09     | 0.09           | 0.00          | 1.00            | 1.00           | 0.00                    | 1.00                    | 26.92  | 3410.80 | 0.00                | -96.74          | 2.83    | 112.53         | 1009.62      | 3.40             | 485.31             | -6.89 | 0.00              | 0.00              | 0.00              | 0.00              | 0.00              | 0.00              | 13.68   |
| Alprazololololololololololololololololololololololololololololololololololol | 1032.91          | 3.43                 | 2.00                 | 38.00                   | 40.00                        | 409.48 | 43.00           | 0.00    | 0.00    | 0.09     | 0.09           | 0.00          | 1.00            | 1.00           | 0.00                    | 1.00                    |        |         |                     |                 |         |                |              |                  |                    |       |                   |                   |                   |                   |                   |                   |         |
